# Supplementary material for: Direct suppression of CNS autoimmune inflammation via the cannabinoid receptor CB1 on neurons and CB2 on autoreactive T cells
Source: Springer Nature journal article supplement (doi:10.1038/nm1561), 2007-04-01
Supplement: 41591_2007_BFnm1561_MOESM47_ESM.pdf [file 41591_2007_BFnm1561_MOESM47_ESM.pdf]

**Supplementary Table 1.** Comparison of EAE clinical disease parameters induced by active immunization in WT and CB<sub>2</sub><sup>-/-</sup> mice.

|                                               | WT         | CB <sub>2</sub> <sup>-/-</sup> |
|-----------------------------------------------|------------|--------------------------------|
| Number of Mice                                | 12         | 13                             |
| Incidence <sup>1</sup>                        | 75%        | 100%                           |
| Average Day of Onset                          | 13         | 12                             |
| Average Day of Peak                           | 21         | 21                             |
| Average Score at Peak ± SD                    | 1.05 ± 0.6 | 2.5 ± 0.7 <sup>4</sup>         |
| Percent Recovery <sup>2</sup>                 | 100%       | 20%                            |
| Average Cumulative Disease Score <sup>3</sup> | 10.5 ± 0.3 | 59 ± 0.9 <sup>4</sup>          |

<sup>1</sup>Represents the percentage of mice that developed a clinical score of at least one.

<sup>2</sup>Represents the percentage of mice that recovered after EAE.

<sup>3</sup>The cumulative disease score was calculated by adding the disease score from the day of onset to day 40. The values shown are the mean ± SD of all the mice with disease in each group.

<sup>4</sup>The p value 0.001 was calculated between WT and CB<sub>2</sub><sup>-/-</sup> mice.
